# Supplementary material for: Variants in the ciliopathy gene SCLT1 are associated with non-syndromic retinal degeneration
Source: Research Square preprint supplement (doi:10.21203/rs.3.rs-6507107/v1), 2025-05-19
Supplement: Supplementary file 1 [file 034741dfdf95719c495b9edf.xlsx]

## Sheet: Supplementary_Table_1
LOVD_ID	Study_ID	SCLT1_ allele 1 (c.)	SCLT1_ allele 1 (p.)	ACMG allele 1	SCLT1_ allele 2 (c.)	SCLT1_ allele 2 (p.)	ACMG allele 2	Reference	Non-syndromic diagnosis	Syndromic diagnosis	Segregation	Ethnicity	Consanguineity
00003131	Index 2	c.290+2T>C	p.Lys79Valfs*4	P	c.290+2T>C	p.Lys79Valfs*4	P	Adly 2014		OFD-IX (without RCD)	Yes	Saudi	Yes
n.a.	F80_142 / F3074-12DG1794	c.290+2T>C	p.Lys79Valfs*4	P	c.290+2T>C	p.Lys79Valfs*4	P	Shaheen 2016		BBS (with RCD)	Yes	Saudi	Yes
n.a.	F237_332	c.290+2T>C	p.Lys79Valfs*4	P	c.290+2T>C	p.Lys79Valfs*4	P	Shaheen 2016		OFD-IX (without RCD)	Yes	Saudi	Yes
00332122	F50‐M	c.290+2T>C	p.Lys79Valfs*4	P	c.290+2T>C	p.Lys79Valfs*4	P	Patel 2017		syndromic microphthalmia	Yes	Saudi	Yes
00301727	17DG1005	c.290+2T>C	p.Lys79Valfs*4	P	c.290+2T>C	p.Lys79Valfs*4	P	Maddirevula 2019		congenital panhypopituitarism; hormonal deficiency affecting only GH and Thyroid; radiological abnormalities (hypoplastic anterior pituitary with shallow sella turcica ectopic posterior lobe, and hypothalamic hamartoma); no history of developmental delay or syndromic features on evaluation	Yes	Arabic. Likely Saudi	Yes
n.a.	17DG1005 sister	c.290+2T>C	p.Lys79Valfs*4	P	c.290+2T>C	p.Lys79Valfs*4	P	Maddirevula 2019		same as affected sister	Yes	Arabic. Likely Saudi	Yes
n.a.	F5962-17DG1005	c.290+2T>C	p.Lys79Valfs*4	P	c.290+2T>C	p.Lys79Valfs*4	P	Shamseldin 2020		BBS (with RCD)	Yes	Saudi	Yes
n.a.	F5962-17DG1006 (sister)	c.290+2T>C	p.Lys79Valfs*4	P	c.290+2T>C	p.Lys79Valfs*4	P	Shamseldin 2020		BBS (with RCD)	Yes	Saudi	Yes
n.a.	F7539-19DG2176	c.290+2T>C	p.Lys79Valfs*4	P	c.290+2T>C	p.Lys79Valfs*4	P	Shamseldin 2020		OFD-IX (without RCD)	Yes	Saudi	Yes
00105025	62ORG	c.778-2A>T	p.?	P	c.827G>A	p.(Arg276His)	VUS	de Castro-Miró 2016	RCD		Yes	Argentina	No
n.a.	Patient 1/SC446	c.1218G>A	p.Met406Ile; ex14 skipping (in frame)	LP	c.1631A>G	p.Lys544Arg	LP	Morisada 2020 / Sakakibara 2022		BBS (with RP)	Yes	Japanese	No
n.a.	Patient 2/KC213	c.1218G>A	p.Met406Ile; ex14 skipping (in frame)	LP	c.1631A>G	p.Lys544Arg	LP	Morisada 2020 / Sakakibara 2022		BBS (with RP)	Yes	Japanese	No
n.a.	JU0947 II-2	c.1218+3insT	p.?	LP	c.1631A>G	p.Lys544Arg	LP	Katagiri 2018		SLS (with EOSRD/LCA)	Yes	Japanese	No
n.a.	Individual 1	c.1218+3A>G	p.?	LP	c.1218+3A>T	p.?	LP	Gillesse 2024		SLS/BBS (with LCA)	Yes	German/Finnish/Irish	No
00447080	CRD671	c.1294-2A>G	p.?	LP	c.2005-1052_*363del	p.?	LP	Weisschuh 2024	CRD		Yes	n.a. Likely German	No
n.a.	III-1	c.1439+1del	p.?	LP	c.1439+1del	p.?	LP	Grudzinska Pechhacker 2024		Minimally Syndromic RCD (obesity and ADHD)	Yes	Middle-East	Yes
n.a.	III-2	c.1439+1del	p.?	LP	c.1439+1del	p.?	LP	Grudzinska Pechhacker 2024		Minimally Syndromic RCD (obesity and ADHD)	Yes	Middle-East	Yes
n.a.	URDGH_005 (Fam_1_II-3)	ex3-10dup (in frame)	p.?	LP	c.1631A>G	p.Lys544Arg	LP	this study	EOSRD		Yes	South Korean	No
n.a.	URDGH_033 (Fam_2_II-4)	c.290+2732A>G	p.?	VUS	c.1631A>G	p.Lys544Arg	LP	this study	RCD		No	South Korean	No
n.a.	KA559 (Fam_3_II-1)	c.439G>T	p.(Ala147Ser)	VUS	c.1631A>G	p.Lys544Arg	LP	this study	RCD		No	Japanese	No
n.a.	OGI163_447 (Fam_4_II-1)	c.671T>G	p.(Leu224Arg)	VUS	c.1706G>A	p.(Ser569Asn)	VUS	this study	RCD		Yes	White	No
n.a.	F4419_CIC07910 (Fam_5_II-1)	c.778_780del	p.(Glu260del)	LP	c.1439+5G>T	p.?	LP	this study	EOSRD		Yes	French	No
n.a.	F4419_CIC11487 (Fam_5_II-2)	c.778_780del	p.(Glu260del)	LP	c.1439+5G>T	p.?	LP	this study	EOSRD		Yes	French	No
Supplementary_Table_1: List of reported syndromic and non-syndromic IRD patients carrying SCLT1 variants. Data were retrieved from the LOVD database (www.LOVD.nl, accessed April 20th, 2025), literature mining, and combined with our case series. ACMG, American College of Medical Genetics variant classification; ADHD, attention deficit/hyperactivity disorder; BBS, Bardet-Biedl syndrome; CRD, cone-r…

## Sheet: Supplementary_Table_2
Reported	SCLT1_c.	SCLT1_p.	ACMG	AF; AC (GnomAD V4)	DNA change (hg38)	Reference	Segregation	Diagnosis
18	c.290+2T>C	p.Lys79Valfs*4	P	AF=6.586e-7; AC=1	g.129039039A>G	Adly 2014, Shaheen 2016, Patel 2017, Maddirevula 2019, Shamseldin 2020	yes	OFD-IX (without RCD); BBS (with RCD); Panhypopituitarism and thalamic hamartoma
1	c.778-2A>T	p.?	P	AF=0.000004392; AC=7	g.128965320T>A	de Castro-Miró 2016	yes	RCD
1	c.827G>A	p.(Arg276His)	VUS	AF=0.00001491; AC=24	g.128965269C>T	de Castro-Miró 2016	yes	RCD
2	c.1218G>A	p.(Met406Ile)	LP	AF=6.676e-7; AC=1	g.128952769C>T	Morisada 2020 / Sakakibara 2022	yes	BBS (with RCD)
1	c.1218+3insT	p.?	LP	n.a.	g.128952766T>TA	Katagiri 2018	yes	SLS (with EOSRD/LCA)
1	c.1218+3A>G	p.?	LP	AF=6.758e-7; AC=1	g.128952766T>C	Gillesse 2024	yes	SLS/BBS (with LCA)
1	c.1218+3A>T	p.?	LP	AF=0.00001419; AC=21	g.128952766T>A	Gillesse 2024	yes	SLS/BBS (with LCA)
1	c.1294-2A>G	p.?	LP	n.a.	g.128946154T>C	Weisschuh 2024	yes	CRD
4	c.1439+1del	p.?	LP	n.a.	g.128946006del	Grudzinska Pechhacker 2024	yes	Minimally Syndromic RCD (obesity and ADHD)
6	c.1631A>G	p.(Lys544Arg)	LP	AF=0.00001997; AC=32 (30 EAS, 2 nf-E)	g.128942997T>C	Katagiri 2018; Morisada_2020/ Sakakibara 2022; this study	yes	BBS (with RCD)
1	c.2005-1052_*363del	p.?	LP	n.a.	g.128884117_ 128885594del	Weisschuh 2024	yes	CRD
1	ex3-10dup (in frame)	p.?	LP	n.a.	?	This study	Yes	EOSRD
1	c.290+2732A>G	p.?	VUS			This study	No	RCD
1	c.439G>T	p.(Ala147Ser)	VUS			This study	No	RCD
1	c.671T>G	p.(Leu224Arg)	VUS			This study	Yes	RCD
1	c.1706G>A	p.(Ser569Asn)	VUS			This study	Yes	RCD
1	c.778_780del	p.(Glu260del)	LP			This study	Yes	EOSRD
1	c.1439+5G>T	p.?	LP			This study	Yes	EOSRD
Supplementary_Table_2: SCLT1 variants detected in syndromic and non-syndromic IRD patients. Data were retrieved from the LOVD database (www.LOVD.nl, accessed April 20th, 2025), literature mining, and combined with our case series. ACMG, American College of Medical Genetics variant classification; ADHD, attention deficit/hyperactivity disorder; BBS, Bardet-Biedl syndrome; CRD, cone-rod dystrophy; …

## Sheet: Supplementary_Table_3
Family_patient	Research_ID	Age at initial visit; Gender	Diagnosis	Ethnicity	Non-retinal features	Ocular symptoms	BCVA	Visual field*	ERG	Fundoscopy	FAF	OCT	Refractive error	Other ocular findings
1_II-3	URDGH_005	43 | F	EOSRD	South Korean	None	Poor vision since age 8-9, nystagmus	LP - OD LP + OS	n.a. due to nystagmus	Not tested due to nystagmus	Optic atrophy, retinal vessel thinning, bone spicule pigmentation, macula sparing	n.a.	Disruption of EZ sparing fovea center, ONL thinning	n.a. due to nystagmus and very poor vision	nystagmus was noted on exam
2_II-4	URDGH_033	57 | M	RCD	South Korean	None	Poor vision since age 55	20/25 OU	Ring scotoma around center on 24-2 Humphrey visual field OU	Scotopic dim flash: 70% NL Scotopic bright flash: 60-70% NL Photopic response: relatively good	Fundus looks relatively normal	Central foveal hypoF, crescent shape hypoF around fovea, ring shape hyperF just right inside major vessel arcarde	Disruption of EZ sparing fovea center, ONL thinning	n.a	bilateral cataracts
3_II-1	KA559	22 | M	RCD	Japanese	Mild intellectual disability, cleft palate	Nyctalopia and reduced visual acuity since age 13	Age: 22 20/100 OD 20/80 OS	Constricted visual field? Poor quality OU	Scotopic and photopic ERG non detectable OU	Bone spicule pigmentation at the peripheral retina	Multiple hypoF dots at peripheral retina with macula sparing, ring shape hyperF around fovea. Around ring shape hyperF, hypoF ring was observed	Disruption of EZ sparing fovea center, ONL thinning	OD: +0.50 -1.25 x 5 OS: +0.50 -0.75 x 55
4_II-1	OGI163_447	25 | F	RCD	White	None	Nyctalopia since early childhood, reduced side vision since age 16	Age 30: 20/50 OD 20/60 OS	Age 30: Contricted centrally to 10 degrees with peripheral islands OU	Age 30: scotopic and photopic ERG non detectable OU	Age 30: normal optic nerve, macular granularity, vessel attenuation, bone spicule pigmentation with macula sparing	n.a.	n.a.	(Age 30) OD -0.75 -1.50 x 173 OS -1 -1.75 x 3
5_II-1	F4419_07910	8 | F	EOSRD	White	None	Poor vision since infancy (15 months), nystagmus	Age 8: 20/500 OD 20/640 OS Age 12: CF OU	Contricted to only peripheral inferior islands OU	Scotopic and photopic ERG non detectable OU	normal posterior pole with mottled and whitish appereance of retinal periphery	Perifoveal ring of increased AF and an irregular increased AF in the periphery	Thinning of the outer retina outside of the macula with preserved ONL at the fovea, hyporeflective EZ and absence of the interdigitation line	OD +5.00 / -0.50 x 170 OS +5.25 / -1.50 x 175	nystagmus was noted on exam
5_II-2	F4419_11487	5 | M	EOSRD	White	None	Poor vision since infancy, nystagmus	Age 7: 20/640 OD 20/800 OS	Contricted to only peripheral inferior islands OU	Scotopic and photopic ERG non detectable OU	Normal posterior pole with mottled and whitish appereance of retinal periphery	Perifoveal ring of increased AF and an irregular increased AF in the periphery	Thinning of the outer retina outside of the macula with preserved ONL at the fovea, hyporeflective EZ and absence of the interdigitation line	OD +5.25 / -1.75 x 180 OS +5.75 / -1.50 x 180	nystagmus was noted on exam
Supplementary_Table_3: Clinical characteristics of IRD probands carrying SCLT1 variants. AF, Autofluorescence; BCVA, best corrected visual acuity; CF, counting fingers; EOSRD, early-onset severe retinal dystrophy; ERG, electroretinogram; EZ, ellipsoid zone; F, female; FAF, Fundus autofluorescence; Hz, Hertz; M, male; MD, macular dystrophy; LP, light perception; n.a., not available; NL, normal; OC…

## Sheet: Supplementary_Table_4
	SpliceAI				Pangolin
SCLT1 variants	Donor loss	Donor gain	Acceptor loss	Acceptor Gain	Splice loss	Splice Gain
V1: c.1631A>G; p.(Lys544Arg)	0.95 (-1bp)	0.8 (5bp)	0.03 (191bp)		0.84 (-1bp)	0.8 (5bp)
V3: c.290+2732A>G			0.15 (-31bp)	0.16 (13bp)		0.15 (-31bp)
V4: c.439G>T; p.(Ala147Ser)		0.01 (-18bp)			0.01 (12bp)	0.01 (-18bp)
V5: c.671T>G; p.(Leu224Arg)		0.06 (-15bp)		0.11 (55bp)		0.04 (-15bp)
V6: c.1706G>A; p.(Ser569Asn)		0.01 (-123bp)		0.01 (73bp)
V7: c.778_780del; p.(Glu260del)	0.28 (-88bp)		0.64 (3bp)	0.19 (0bp)	0.89 (3bp)	0.74 (0bp)
V8: c.1439+5G>T	0.12 (5bp)	0.33 (-80bp)	0.18 (162bp)		0.65 (5bp)	0.08 (-80bp)
Supplementary_Table_4: SpliceAI and Pangolin predictions for seven SCLT1 variants described in this study. All variants are single-nucleotide variant or small indel (e.g.V7), while V2 is structural variant for which prediction was not available. For each available score, (bp) indicates the nucleotide position upstream or downstream of the variant serving as potential splice acceptor or donor site.

## Sheet: Supplementary_Table_5
SCLT1_ (c.)	SCLT1_ (p.)	ACMG	SIFT (0-1)	PolyPhen (0-1)	CADD_Phred (1-99)	REVEL (0-1)
c.827G>A	p.(Arg276His)	VUS	0.013	0.998	25.6	0.162
c.1218G>A	p.Met406Ile; ex14 skipping (in frame)	LP	0.042	0.125	33	0.12
c.1631A>G	p.Lys544Arg	LP	0.01	0.814	35	0.09
c.439G>T	p.(Ala147Ser)	VUS	0.027	0.783	24.2	0.156
c.671T>G	p.(Leu224Arg)	VUS	0.001	0.999	25.5	0.272
c.1706G>A	p.(Ser569Asn)	VUS	0.226	0.961	22.6	0.087
Supplementary_Table_5: In silico prediction of reported SCLT1 missense variants. ACMG, American College of Medical Genetics variant classification; LP, likely pathogenic; VUS, variant of uncertain significance.

## Sheet: Supplementary_Table_6
Primer Name	Primer Sequence	Technique
SCLT1_exon9_F	CAGTTTCTTCCCATCCTAACAG	Sanger sequencing (V5 in Family 4)
SCLT1_exon9_R	CATAAGACAGGAATGCAGGTG	Sanger sequencing (V5 in Family 4)
SCLT1_exon18_F	CTGAAGAAAAAGGTAAGGTCCAG	Sanger sequencing (V6 in Family 4)
SCLT1_exon18_R	CTGACCAAACTTGATTTCTTACG	Sanger sequencing (V6 in Family 4)
SCLT1_exon14_F	GAACTTTCAGCCCTTCAAATG	RT-PCR (V1 in family 1 and 2 proband)
SCLT1_exon20_R	GCCTGACTTAGACGCCTTTG	RT-PCR (V1 in family 1 and 2 proband)
SCLT1_exon10_F	GCCAAATTAGAGCTGAGAGTTG	RT-PCR (V2 in family 1 proband)
SCLT1_exon3_R	CTAGGTTTTCAAATGTGTCGTCTC	RT-PCR (V2 in family 1 proband)
SCLT1_exon11_R	CTAGACTGTAACTGCTGTAAACGC	RTPCR control
SCLT1_exon5_F	GGTGGGTGAGATGAAATTACAAC	RT-PCR (V3 in family 2 proband)
SCLT1_exon6_R	GGCTAGCTGCAATTGTTCTTG	RT-PCR (V3 in family 2 proband)
SCLT1_ c.778_780del_REF	CTTAGAAAGTTGATACAAATAAAATTTATTAATATAGGTCAAATCATCACTATGTCAAAGAAGAAAGACCCTGTGATTACCTTGATAGTTAATGAGACATAGAATAATATAGTTAAGAGAGCATATTCTAAAGGCACATTATCTGCATAGAAATCCCTCTCGTTTTGTTAGACTTGTACTATAGAAATAGTTTGAAATATTGGTAGAAATCTATGTGCAATAACTGTTTGGAGTATTTTTTATTAACACAGGATTGATGATGAAGTTCTCCCCTCCTTTTTATTATACACATGATTTGTTTCCAAAGTCATATTGTTTCTTTTAACGTAAGTGTTAGAATGCTAATAGCATAATAACTTTATAGCATGAGCTGTTTTCTTTATGCTGTATAATGGTGTA…
SCLT1_ c.778_780del	CTTAGAAAGTTGATACAAATAAAATTTATTAATATAGGTCAAATCATCACTATGTCAAAGAAGAAAGACCCTGTGATTACCTTGATAGTTAATGAGACATAGAATAATATAGTTAAGAGAGCATATTCTAAAGGCACATTATCTGCATAGAAATCCCTCTCGTTTTGTTAGACTTGTACTATAGAAATAGTTTGAAATATTGGTAGAAATCTATGTGCAATAACTGTTTGGAGTATTTTTTATTAACACAGGATTGATGATGAAGTTCTCCCCTCCTTTTTATTATACACATGATTTGTTTCCAAAGTCATATTGTTTCTTTTAACGTAAGTGTTAGAATGCTAATAGCATAATAACTTTATAGCATGAGCTGTTTTCTTTATGCTGTATAATGGTGTA…
SCLT1_ c.1439+5G_REF	GCATGAATAATTCCAAAAAAATAAATTCTATTTTTTAAGAGACAAGGTCTTGCCCGATTATCCAGACTGGAGTACAGTGGACATGATCATGGCTCACTGCAGCCTCGATCTCCTGGGCTCAAGGATCCTCCTACCTGAGCCTCCCTAATAGCTGGGACTGCAAGTGTGAGCCACCATGCCCAGCTAATTTTTTAATACTTTTTTTAGATGACAGGGTCTTGCTATGTTGCCCAGGCTGGTCTCAAAACTATTATTATTTTATATATTAGTTTTTAGCATTTTATTTTGTAAATGTGACAGAACCAGATTTAATTATTGATATGTTTCATATGTTACGGTCAGAACAAATGAACACATAATCATGGCTTTTTATTTCTTCCATTGATTTCTGTTTCTAAA…
SCLT1_ c.1439+5G>T	GCATGAATAATTCCAAAAAAATAAATTCTATTTTTTAAGAGACAAGGTCTTGCCCGATTATCCAGACTGGAGTACAGTGGACATGATCATGGCTCACTGCAGCCTCGATCTCCTGGGCTCAAGGATCCTCCTACCTGAGCCTCCCTAATAGCTGGGACTGCAAGTGTGAGCCACCATGCCCAGCTAATTTTTTAATACTTTTTTTAGATGACAGGGTCTTGCTATGTTGCCCAGGCTGGTCTCAAAACTATTATTATTTTATATATTAGTTTTTAGCATTTTATTTTGTAAATGTGACAGAACCAGATTTAATTATTGATATGTTTCATATGTTACGGTCAGAACAAATGAACACATAATCATGGCTTTTTATTTCTTCCATTGATTTCTGTTTCTAAA…
Supplementary_Table_6: SCLT1 primers and genomic fragments for splicing assay employed in this study.
