# Supplementary material for: Variants in the ciliopathy gene SCLT1 are associated with non-syndromic retinal degeneration
Source: Research Square preprint supplement (doi:10.21203/rs.3.rs-6507107/v1), 2025-05-19
Supplement: Supplementary file 1 [file afe2685c91519905301b5f7e.pdf]

Supplementary Figure 1

Family 3 - RCD

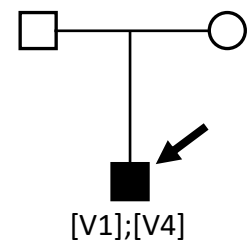

V1: c.1631A>G; p.(Lys544Arg)  
V4: c.439G>T; p.(Ala147Ser)

Genotype Counts

|                 |         |     |     |
|-----------------|---------|-----|-----|
| 4-129920937-C-A |         |     |     |
|                 | C/C     | C/A | A/A |
| T/T             | 120,396 | 8   | 0   |
| 4-129864152-T-C | T/C     | 2   | 0   |
|                 | C/C     | 0   | 0   |

- Samples consistent with variants appearing in isolation or on different haplotypes.
- Samples consistent with variants appearing on the same haplotype.
- Samples consistent with either co-occurrence pattern.

Based on their co-occurrence pattern in gnomAD, these variants are likely found on different haplotypes in most individuals in gnomAD.

**Note** Because no individual in gnomAD carries both variants, this table was computed based on the separate variant information and does not account for the possibility that some samples may not be covered at both variant sites.

Variant 1 (required)  
4-129864152-T-C

Variant 2 (required)  
4-129920937-C-A

Submit

Overview

| Genetic ancestry group   | Samples consistent with variants appearing in isolation or on different haplotypes | Samples consistent with variants appearing on the same haplotype | Samples consistent with either co-occurrence pattern | Likely co-occurrence pattern |
|--------------------------|------------------------------------------------------------------------------------|------------------------------------------------------------------|------------------------------------------------------|------------------------------|
| African/African American | 0                                                                                  | 0                                                                | 0                                                    | No prediction*               |
| Admixed American         | 0                                                                                  | 0                                                                | 0                                                    | No prediction*               |
| Ashkenazi Jewish         | 0                                                                                  | 0                                                                | 0                                                    | No prediction*               |
| East Asian               | 10                                                                                 | 0                                                                | 0                                                    | Different haplotypes         |
| European (Finnish)       | 0                                                                                  | 0                                                                | 0                                                    | No prediction*               |
| European (non-Finnish)   | 0                                                                                  | 0                                                                | 0                                                    | No prediction*               |
| Remaining individuals    | 0                                                                                  | 0                                                                | 0                                                    | No prediction*               |
| South Asian              | 0                                                                                  | 0                                                                | 0                                                    | No prediction*               |
| All                      | 10                                                                                 | 0                                                                | 0                                                    | Different haplotypes         |

\* A likely co-occurrence pattern cannot be calculated in some cases, such as when only one of the variants is observed in a genetic ancestry group, or when both variants are singletons and were seen in the same individual.

Haplotype Counts

|                 |   |         |   |
|-----------------|---|---------|---|
| 4-129920937-C-A |   |         |   |
|                 |   | C       | A |
| 4-129864152-T-C | T | 240,802 | 8 |
|                 | C | 2       | 0 |

The estimated probability that these variants occur in different haplotypes is 100%.

**Note** Probability values are not well calibrated, particularly where both variants are extremely rare. Interpret with caution. Please see our [blog post on variant co-occurrence](#) for accuracy estimates and additional detail.

Supplementary Figure 1: Confirmation of the *trans* configuration of the *SCLT1* variants V1 and V4 in family 3 proband, according to the gnomAD v2 Variant Co-Occurrence tool.

## Supplementary Figure 2

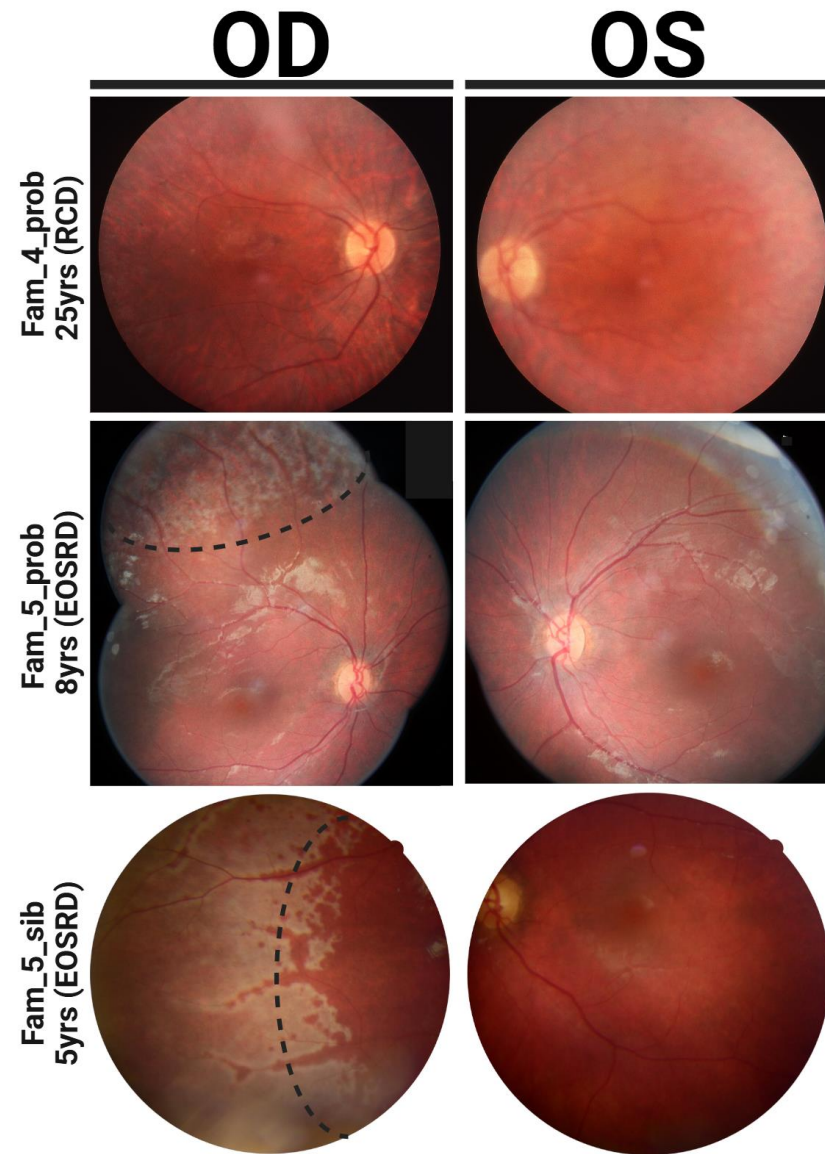

**Family 4 - RCD**

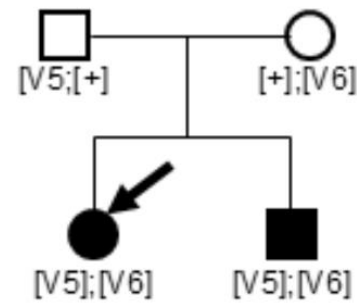

**V5:** c.671T>G; p.(Leu224Arg)  
**V6:** c.1706G>A; p.(Ser569Asn)

**Family 5 - EOSRD**

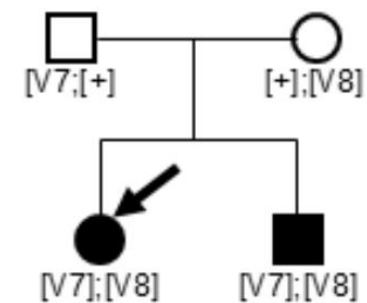

**V7:** c.778\_780del; p.(Glu260del)  
**V8:** c.1439+5G>T

**Supplementary Figure 2:** Fundus pictures of family 4 proband and family 5 affected siblings. Family 5 siblings exhibit numerous mottled and whitish lesions in the peripheral retina, highlighted as areas behind the dashed line.

## Supplementary Figure 3

c.1631A>G (V1)

c.290+2732A>G  
(V3)

e10F -3R

e10F -11R

c.778\_780del (V7)

c.1439+5G>T (V8)

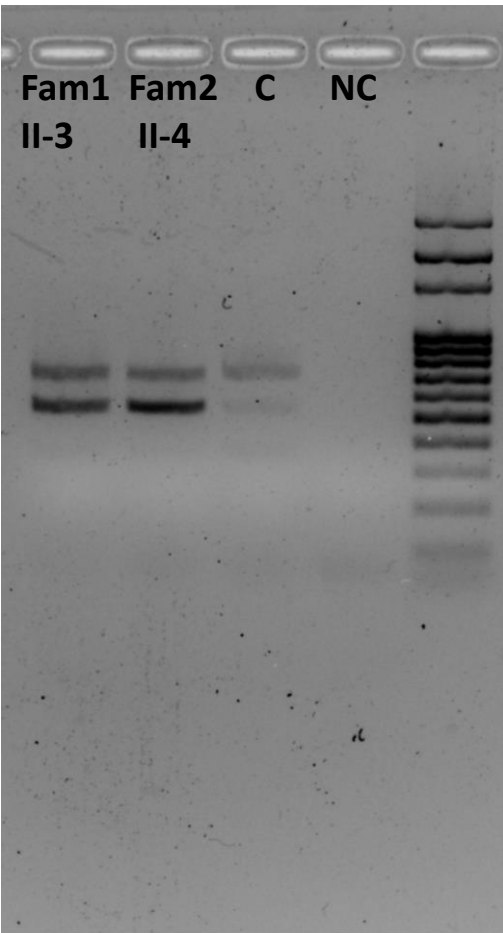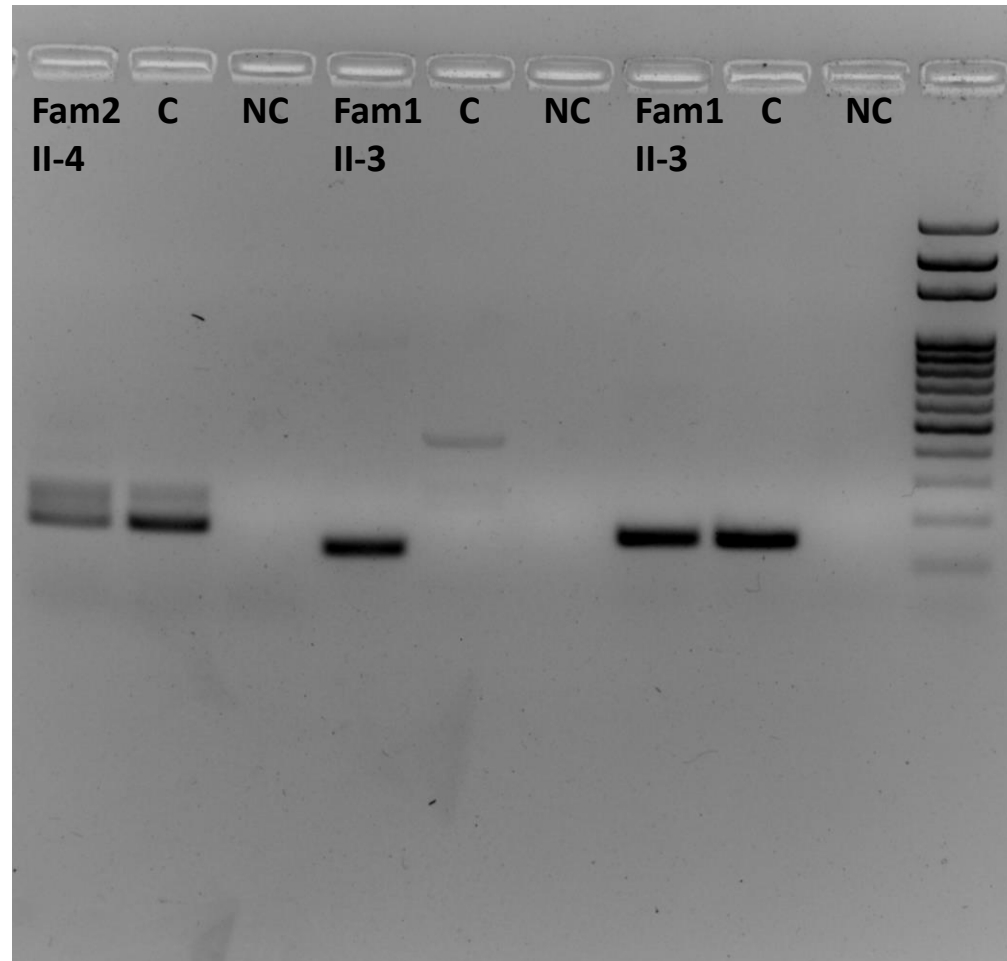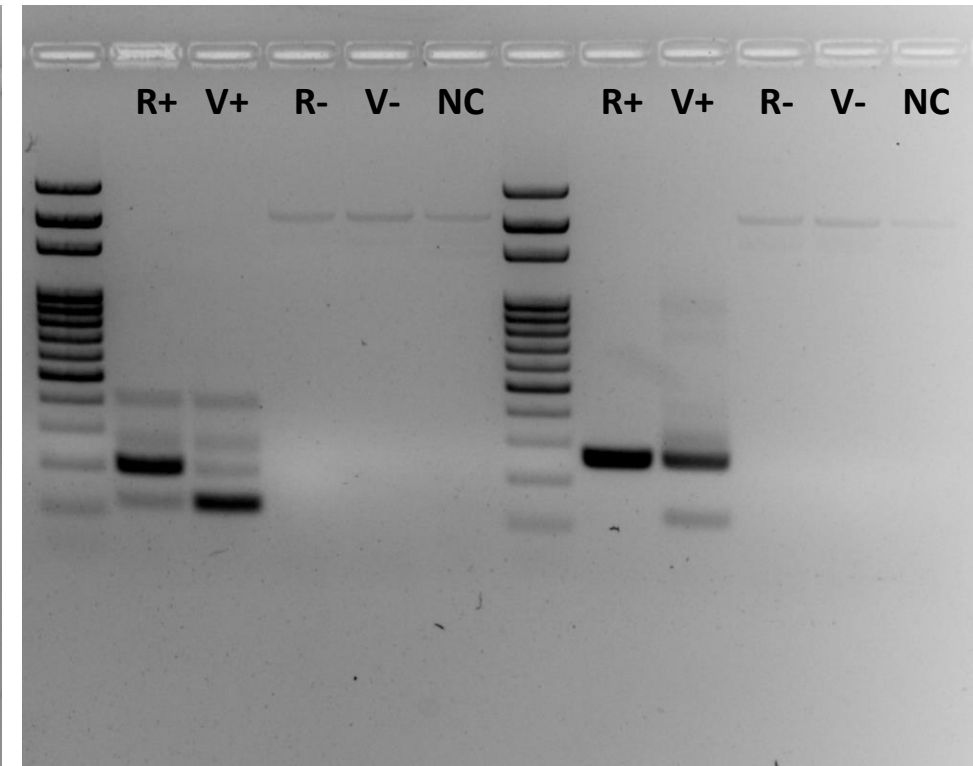

**Supplementary Figure 3:** Uncropped and unprocessed scans of gel blots showed in Figure 3. C, control; NC, negative control; R, reference splicing construct; V, mutant splicing construct; +, RT+; -, RT-.

## Supplementary Figure 4

**A**

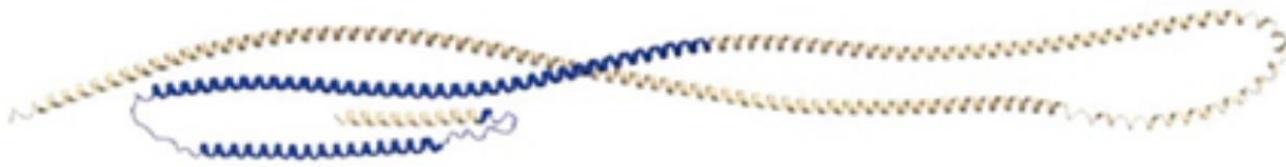

**B**

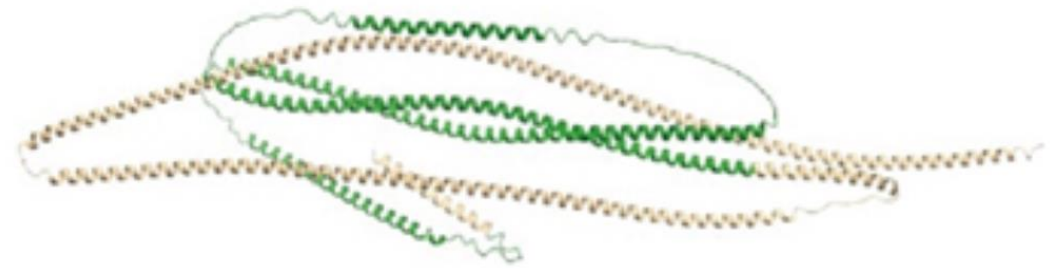

**Supplementary Figure 4: Structural modeling of wild-type SCLT1 and SCLT1 exon 3-10 duplication.** To evaluate the structural changes caused by the in-frame exon 3-10 duplication in *SCLT1*, we performed structural modeling using the AlphaFold Server3 (<https://alphafoldserver.com>). (A) Structural model of wild-type SCLT1 with the exon 3-10 regions highlighted in blue (B) AlphaFold predicts increased intra-protein interactions in the *SCLT1* exon 3-10 duplication variant. The wild-type elongated linker protein is predicted to become shortened due to the exon 3-10 duplication, potentially leading to a loss of function. The duplicated exon 3-10 regions are highlighted in green.
